# Supplementary material
Source: PubMed Central journal article supplement (PMC6388713)
Supplement: Supp_Fig1.pdf [file Supp_Fig1.pdf]

## Supplementary Data

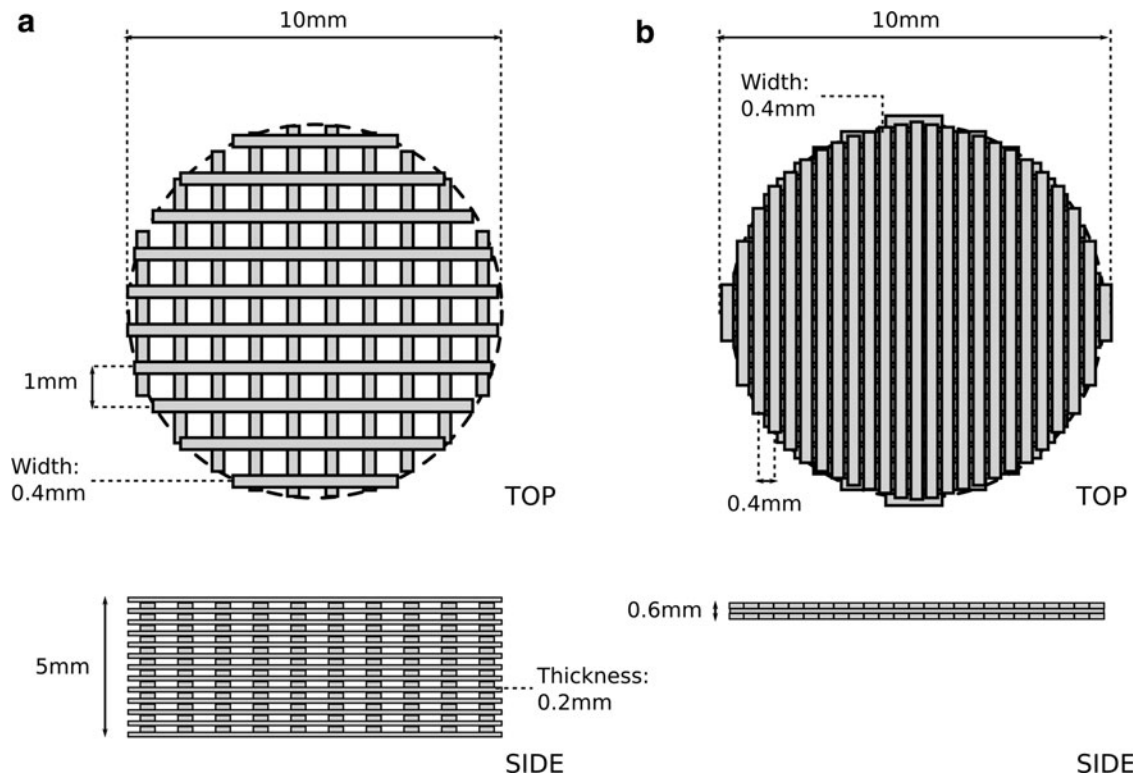

**SUPPLEMENTARY FIG. S1.** Annotated schematic of the 3D-printed PCL/ $\beta$ -TCP (80:20) scaffolds used in the experiments: **(a)** scaffold used for physical properties assessment, **(b)** scaffold used for biological evaluation.
