# Supplementary material
Source: PubMed Central journal article supplement (PMC6388713)
Supplement: Supp_Fig3.pdf [file Supp_Fig3.pdf]

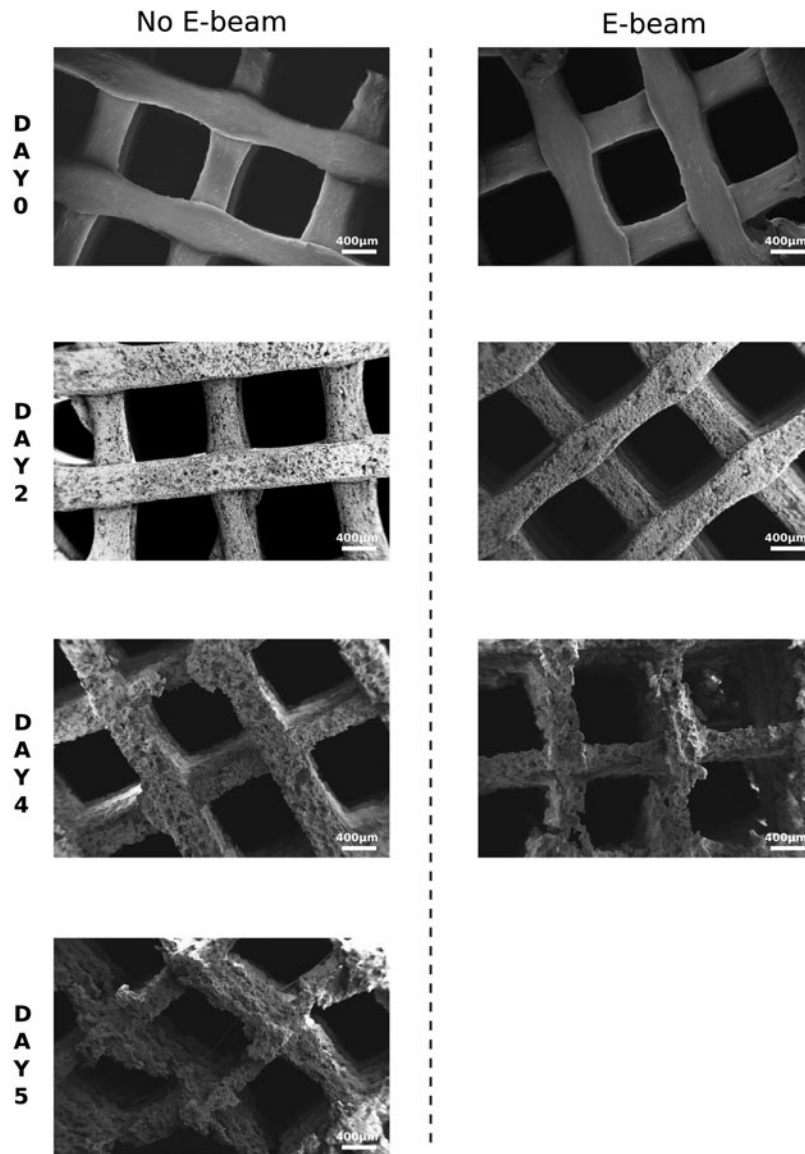

**SUPPLEMENTARY FIG. S3.** SEM images of 3D-printed PCL/ $\beta$ -TCP (80:20) scaffolds during degradation under alkaline conditions, at days 0, 2, 4, and 5. Two groups are compared: exposed and not exposed to E-beam sterilization. Two magnifications are presented:  $\times 90$  (first page) and  $\times 5000$  (second page).

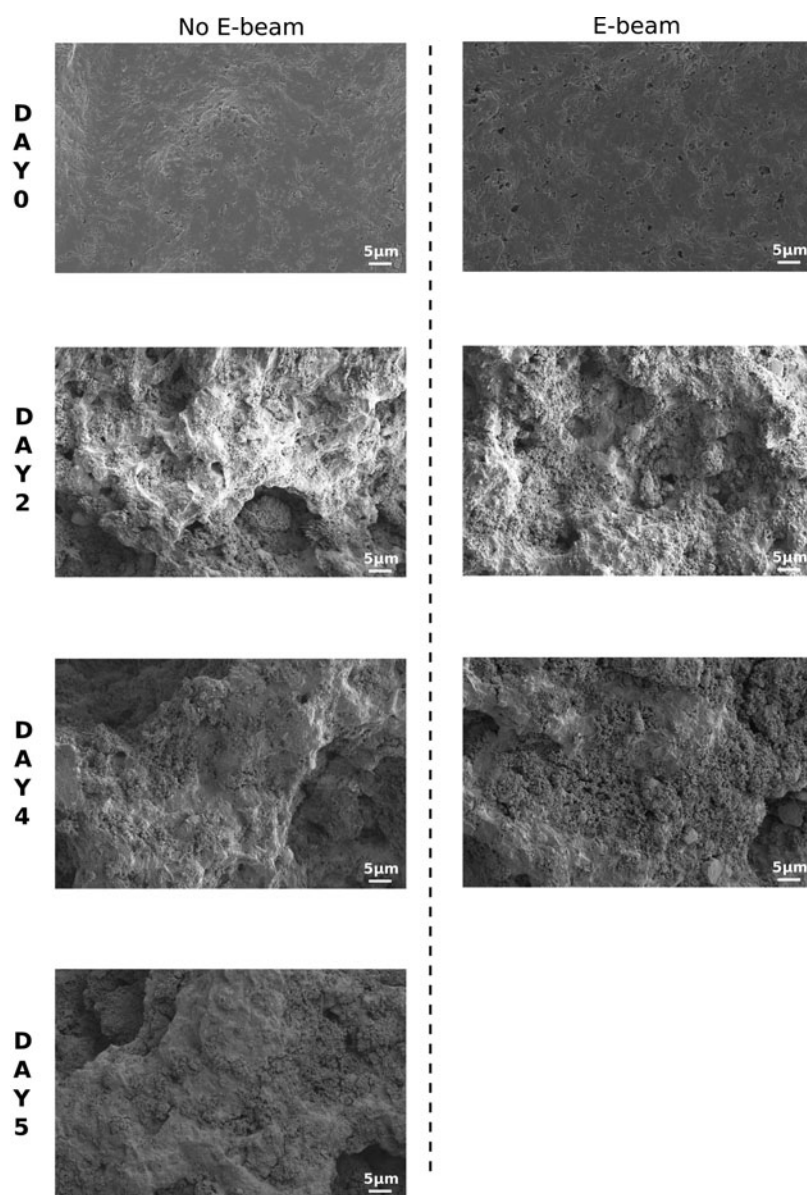

**SUPPLEMENTARY FIG. S3.** (Continued).
